# Supplementary material for: Low-cost and large-scale synthesis of functional porous materials for phosphate removal with high performance
Source: Royal Society of Chemistry journal article supplement (doi:10.1039/c3nr01574b), 2013-01-01
Supplement: c3nr01574b.pdf [file c3nr01574b.pdf]

**Electronic Supplementary Information**

---

**Low-cost and Large-scale Synthesis of Functional Porous Materials for  
Phosphate Removal with High Performance**

*Irene Emmanuelawati,<sup>‡</sup> Jie Yang,<sup>‡</sup> Jun Zhang, Hongwei Zhang, Liang Zhou,\* Chengzhong  
Yu\**

Australian Institute for Bioengineering and Nanotechnology, The University of Queensland,  
Brisbane, QLD 4072, Australia.

\* Email: l.zhou1@uq.edu.au; c.yu@uq.edu.au; Tel: (+61)7-334 63283.

<sup>‡</sup> These authors contribute equally to this paper.

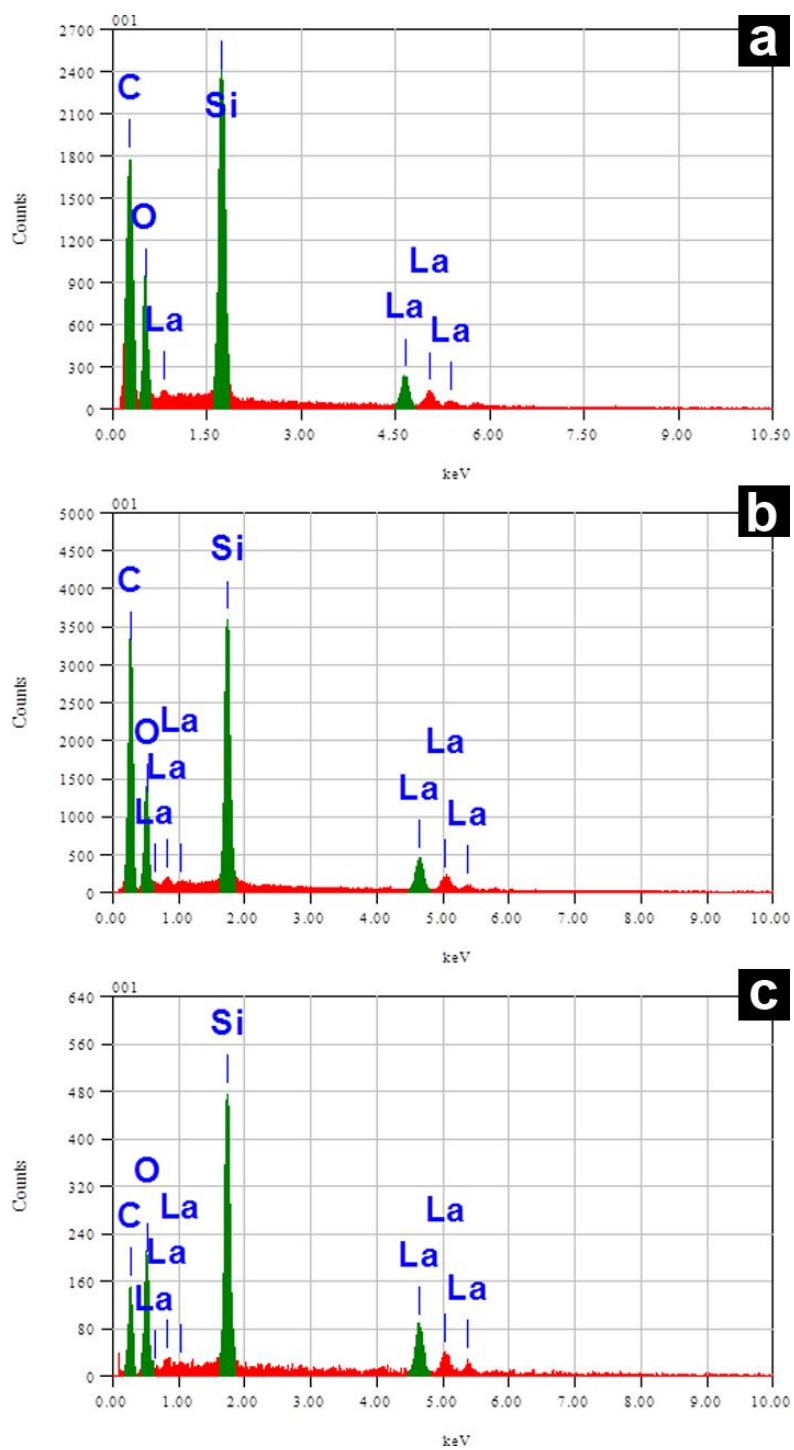

**Figure S1.** EDS patterns of La<sub>100</sub>-A (a), La<sub>150</sub>-A (b), and La<sub>200</sub>-A (c).

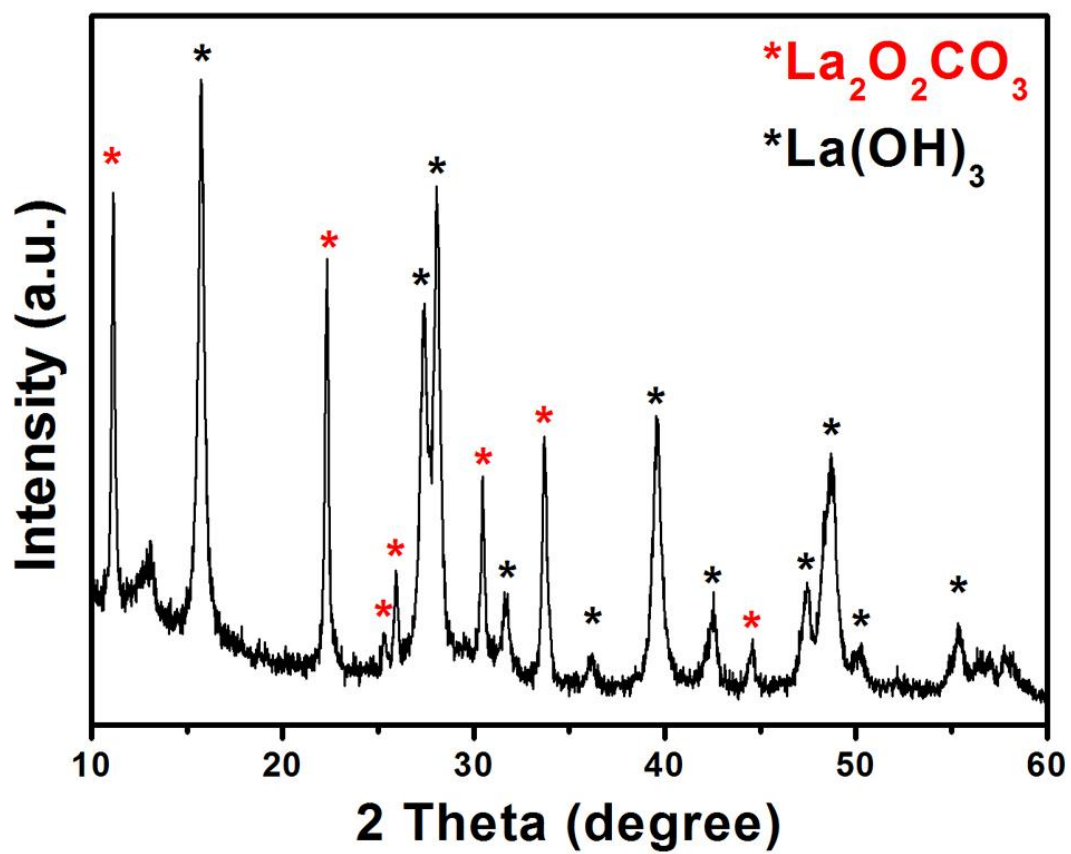

**Figure S2.** XRD pattern of  $\text{La}(\text{NO}_3)_3 \cdot 6\text{H}_2\text{O}$  after calcination in air at 550 °C for 5 h.

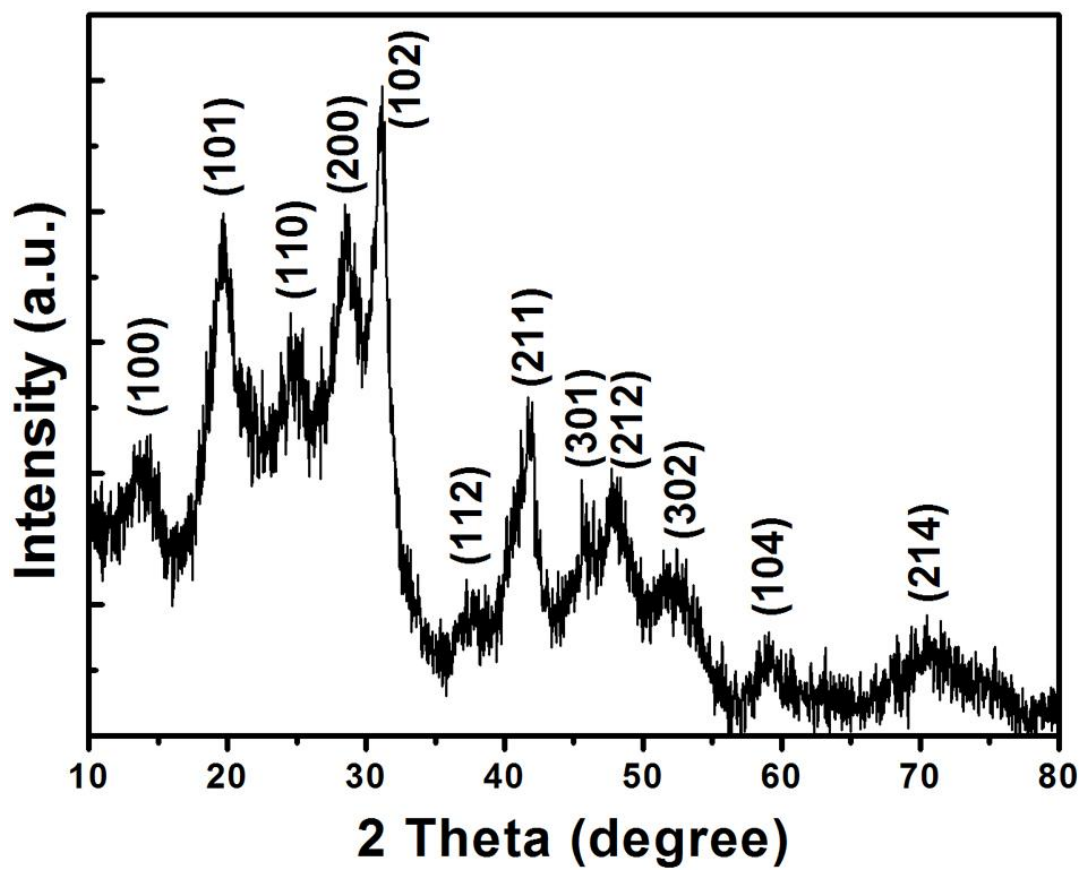

**Figure S3.** XRD pattern of La<sub>150</sub>-A after phosphate adsorption.
